# Supplementary material
Source: publisher site journal article supplement (https://www.dovepress.com/get_supplementary_file.php?f=supplementary_file_5_51969.pdf)
Supplement: Supplementary file 1 [file get_supplementary_file.php]

**Table S5. The significant difference in overall survival (P value < 0.05) between the up- and down-regulation groups**

|    | p-value   | UniqueID        | Overall survival with up-regulation (p < 0.05) | Overall survival with down-regulation (p < 0.05) |
|----|-----------|-----------------|------------------------------------------------|--------------------------------------------------|
| 1  | 3.50E-05  | hsa-miR-505     | 0.0000                                         |                                                  |
| 2  | 7.98E-05  | hsa-miR-505*    |                                                |                                                  |
| 3  | 0.0001237 | hsa-miR-198     |                                                |                                                  |
| 4  | 0.0002383 | hsa-miR-551b*   |                                                | 0.016                                            |
| 5  | 0.0002502 | hsa-miR-298     |                                                |                                                  |
| 6  | 0.0002524 | hsa-miR-652     | 0.0000                                         |                                                  |
| 7  | 0.0002593 | hsa-miR-342-5p  | 0.007                                          |                                                  |
| 8  | 0.0003304 | hsa-miR-320     |                                                | 0.0000                                           |
| 9  | 0.0004052 | hsa-miR-98      | 0.003                                          |                                                  |
| 10 | 0.0005728 | hsa-miR-422a    |                                                | 0.038                                            |
| 11 | 0.0005732 | hsa-miR-622     |                                                |                                                  |
| 12 | 0.0007365 | hsa-miR-1224-5p |                                                | 0.001                                            |
| 13 | 0.000844  | hsv1-miR-H1     |                                                |                                                  |
| 14 | 0.0009509 | hcmv-miR-UL112  |                                                | 0.034                                            |
| 15 | 0.0009946 | hsa-miR-483-5p  |                                                | 0.014                                            |
| 16 | 0.0010245 | hsa-miR-604     |                                                |                                                  |
| 17 | 0.001154  | hsa-miR-148a    | 0.0000                                         |                                                  |
| 18 | 0.0012233 | hsa-miR-193b*   |                                                | 0.0000                                           |
| 19 | 0.0012534 | hsa-miR-936     |                                                |                                                  |
| 20 | 0.0012857 | hsa-miR-518c*   |                                                | 0.05                                             |
| 21 | 0.0014115 | hsa-miR-7-1*    | 0.002                                          |                                                  |
| 22 | 0.0014239 | hsa-miR-148b    | 0.001                                          |                                                  |
| 23 | 0.0014795 | hsa-miR-671-5p  |                                                |                                                  |
| 24 | 0.0017964 | hsa-miR-659     |                                                | 0.026                                            |
| 25 | 0.0019915 | hsa-miR-421     | 0.002                                          |                                                  |
| 26 | 0.0019962 | hsa-miR-202     |                                                | 0.004                                            |
| 27 | 0.002064  | hcmv-miR-US4    |                                                | 0.018                                            |
| 28 | 0.0022108 | hsa-miR-148a*   | 0.018                                          |                                                  |
| 29 | 0.0022217 | ebv-miR-BART7   |                                                |                                                  |
| 30 | 0.0025131 | hsa-miR-572     |                                                |                                                  |
| 31 | 0.002588  | hsa-let-7i*     | 0.001                                          |                                                  |
| 32 | 0.00285   | hsa-miR-146a    | 0.001                                          |                                                  |
| 33 | 0.002859  | hsa-miR-519e*   |                                                |                                                  |
| 34 | 0.002902  | hsa-miR-127-5p  |                                                | 0.0000                                           |
| 35 | 0.0029226 | hsa-miR-801     |                                                | 0.016                                            |
| 36 | 0.0029539 | hsa-miR-454*    | 0.0000                                         |                                                  |
| 37 | 0.0029783 | hsa-miR-15b     |                                                |                                                  |
| 38 | 0.0030655 | hsa-miR-15b*    | 0.042                                          |                                                  |
| 39 | 0.0033478 | hsa-miR-188-5p  |                                                |                                                  |
| 40 | 0.003366  | hsa-miR-374b    | 0.001                                          |                                                  |
| 41 | 0.0033845 | hsa-miR-302c*   |                                                | 0.01                                             |
| 42 | 0.0033982 | hsa-miR-638     |                                                | 0.011                                            |
| 43 | 0.003482  | hsa-miR-135b    | 0.018                                          |                                                  |
| 44 | 0.0035995 | hsa-miR-625     | 0.045                                          |                                                  |
| 45 | 0.0036094 | hsa-miR-648     |                                                |                                                  |
| 46 | 0.0037995 | hsa-miR-454     | 0.019                                          |                                                  |
| 47 | 0.0038355 | hsa-miR-665     |                                                | 0.008                                            |
| 48 | 0.0041485 | hsa-miR-374a    | 0.003                                          |                                                  |
| 49 | 0.0041876 | hsa-miR-520b    |                                                |                                                  |
| 50 | 0.0044096 | hsa-let-7g      | 0.04                                           |                                                  |
| 51 | 0.004825  | hsa-miR-1225-5p |                                                | 0.014                                            |
| 52 | 0.0048522 | hsa-miR-545     | 0.006                                          |                                                  |
| 53 | 0.0051711 | hsa-miR-370     |                                                | 0.011                                            |
| 54 | 0.0052882 | hiv1-miR-H1     |                                                |                                                  |
| 55 | 0.0056005 | hsa-miR-138-1*  |                                                | 0.013                                            |
| 56 | 0.0056733 | hsa-miR-504     | 0.002                                          |                                                  |
| 57 | 0.0059034 | hsa-miR-7       |                                                |                                                  |
| 58 | 0.006244  | hcmv-miR-US5-1  |                                                |                                                  |
| 59 | 0.0064581 | hsa-miR-326     | 0.001                                          |                                                  |
| 60 | 0.0066919 | hsa-miR-16-2*   | 0.038                                          |                                                  |
| 61 | 0.0067514 | hsa-miR-601     |                                                |                                                  |
| 62 | 0.0072169 | hsa-miR-361-3p  | 0.003                                          |                                                  |
| 63 | 0.0077369 | hsa-miR-7-2*    | 0.02                                           |                                                  |
| 64 | 0.0078542 | hsa-miR-32*     |                                                |                                                  |
| 65 | 0.0094757 | hsa-miR-21      | 0.026                                          |                                                  |
| 66 | 0.0095382 | hsa-miR-575     |                                                | 0.008                                            |
| 67 | 0.009619  | hsa-miR-136     |                                                | 0.008                                            |
| 68 | 0.0100096 | hsa-miR-150     |                                                |                                                  |
| 69 | 0.0104964 | hsa-miR-373     |                                                |                                                  |

|     |           |                    |       |       |
|-----|-----------|--------------------|-------|-------|
| 70  | 0.011889  | hsa-miR-921        |       |       |
| 71  | 0.0130906 | hsa-miR-125b-1*    |       | 0.001 |
| 72  | 0.0133086 | hsa-miR-592        | 0.009 |       |
| 73  | 0.0135464 | hsa-miR-128        |       |       |
| 74  | 0.0135734 | hsa-miR-663        |       | 0.027 |
| 75  | 0.0141375 | kshv-miR-K12-3     |       |       |
| 76  | 0.0143468 | hsv1-miR-LAT       |       | 0.017 |
| 77  | 0.0145216 | hsa-let-7d         |       |       |
| 78  | 0.0149738 | hsa-miR-765        |       |       |
| 79  | 0.0152047 | hsa-miR-411*       |       |       |
| 80  | 0.0153969 | hsa-miR-520e       |       |       |
| 81  | 0.0164482 | hsa-miR-657        |       |       |
| 82  | 0.0164508 | hsa-miR-557        |       |       |
| 83  | 0.0167117 | hsa-miR-220c       |       |       |
| 84  | 0.0170307 | ebv-miR-BART13     |       |       |
| 85  | 0.0170564 | hsa-miR-583        |       | 0.032 |
| 86  | 0.0183279 | kshv-miR-K12-7     |       |       |
| 87  | 0.0189751 | hcmv-miR-US25-2-3p |       | 0.013 |
| 88  | 0.0190479 | hsa-let-7i         |       |       |
| 89  | 0.0196586 | hsa-miR-584        |       |       |
| 90  | 0.0197467 | hsa-miR-340*       |       |       |
| 91  | 0.020405  | hsa-miR-934        |       | 0.005 |
| 92  | 0.0208717 | hcmv-miR-UL70-3p   |       | 0.05  |
| 93  | 0.0210945 | ebv-miR-BART12     |       |       |
| 94  | 0.021625  | hsa-miR-450b-3p    | 0.01  |       |
| 95  | 0.0218664 | hsa-miR-135a*      |       | 0.022 |
| 96  | 0.0221847 | hsa-miR-494        |       |       |
| 97  | 0.0223371 | hsa-miR-140-3p     |       |       |
| 98  | 0.0230398 | hsa-miR-22         |       | 0.037 |
| 99  | 0.0230498 | hsa-miR-199a-5p    |       |       |
| 100 | 0.023554  | hsa-miR-614        |       |       |
| 101 | 0.0236569 | hsa-miR-493        |       |       |
| 102 | 0.0241901 | hsa-miR-197        |       |       |
| 103 | 0.0244529 | hsa-miR-450a       |       |       |
| 104 | 0.024629  | hsa-miR-150*       |       |       |
| 105 | 0.0252488 | hsa-miR-569        | 0.015 |       |
| 106 | 0.0261403 | hsa-miR-885-5p     |       |       |
| 107 | 0.0264095 | hsa-miR-513a-3p    |       |       |
| 108 | 0.0265702 | hsa-miR-574-3p     |       |       |
| 109 | 0.0266317 | hsa-miR-938        |       |       |
| 110 | 0.0269845 | hsa-miR-550*       |       |       |
| 111 | 0.0272692 | hsa-miR-377        |       |       |
| 112 | 0.0279903 | hsa-let-7f         | 0.021 |       |
| 113 | 0.028701  | hsa-miR-92a-1*     |       |       |
| 114 | 0.0289725 | hsa-let-7f-2*      | 0.012 |       |
| 115 | 0.0292784 | hsa-miR-190        | 0.01  |       |
| 116 | 0.0298203 | hsa-miR-611        |       |       |
| 117 | 0.0300057 | hsa-miR-886-5p     | 0.033 |       |
| 118 | 0.0324362 | hsa-miR-744        | 0.025 |       |
| 119 | 0.0326354 | hsa-miR-766        |       |       |
| 120 | 0.0337852 | hsa-miR-125a-3p    |       |       |
| 121 | 0.0355667 | hsa-miR-582-5p     |       |       |
| 122 | 0.0364165 | hsa-miR-149*       |       |       |
| 123 | 0.0371401 | hsa-miR-219-2-3p   |       |       |
| 124 | 0.0374672 | hsa-miR-616        |       |       |
| 125 | 0.0383869 | hsa-miR-331-5p     |       |       |
| 126 | 0.0385407 | hsa-miR-660        |       |       |
| 127 | 0.0406249 | hsa-miR-34c-3p     |       | 0.017 |
| 128 | 0.040641  | hsa-miR-214        |       |       |
| 129 | 0.0410674 | hsa-miR-453        |       |       |
| 130 | 0.0410702 | hsa-miR-33b        |       |       |
| 131 | 0.0421641 | hsa-miR-630        |       |       |
| 132 | 0.0422188 | ebv-miR-BART19-3p  |       |       |
| 133 | 0.044489  | hsa-miR-28-3p      |       |       |
| 134 | 0.044819  | hsa-miR-302d*      |       | 0.028 |
| 135 | 0.0462451 | hsa-miR-647        |       |       |
| 136 | 0.0466518 | ebv-miR-BHRF1-1    |       |       |
| 137 | 0.0469831 | hsa-miR-297        |       |       |
| 138 | 0.0471159 | hsa-miR-362-3p     |       |       |
| 139 | 0.0484237 | hsa-miR-744*       |       |       |
| 140 | 0.0484903 | hsa-miR-769-3p     |       |       |
| 141 | 0.0485942 | hsa-miR-27a        |       |       |
| 142 | 0.0490659 | hsa-miR-623        |       |       |
